# Supplementary material
Source: publisher figshare collection journal article supplement (https://karger.figshare.com/ndownloader/files/30750214)
Supplement: Supplementary file 1 [file 30750214]

| **Table S2: Changes of secondary outcome for subgroups** | | | |
| --- | --- | --- | --- |
| **Variable** | **NEG group** | **POS group** | **Statistics:** |
| **n** | 106 | 104 |  |
| **Anxiety [GAD-7]**  MeanPost *(SD)[95% CI]* ∆Mean between t0 and *t1 (SD)* MedianPost *[IQR]*  MCID improved *(%)*  MCID did not change *(%)*  MCID worsened *(%)* | 5.5 (4.0) [4.8-6.3] -1.4 (3.6) 5 [3-8.8]  26  67  7 | 7.7 (4.5) [6.9-8.6] -1.0 (3.9) 7[5-10]  26  64  10 | F(1)=0.527, *p*=.469, ƞp2=.003 |
| **Depression [PHQ-9]**  MeanPost *(SD)[95% CI]* ∆Mean between t0 and *t1 (SD)* MedianPost *[IQR]*  MCID improved *(%)*  MCID did not change *(%)*  MCID worsened *(%)* | 6.2 (4.2) [5.4-7.0] -1.4 (3.7) 6 [3-8.8]  32  62  6 | 9.5 (5.8) [8.4-10.6] -1.6 (4.7) 9 [5-13]  26  67  7 | F(1, 207)=3.237, *p*=.073;  ƞp2 =0.015 |
| **Quality of Life [SF-12]**  **a) Mental Sum score**MeanPost *(SD)[95% CI]* ∆Mean between t0 and *t1 (SD)* MedianPost *[IQR]*  MCID improved *(%)*  MCID did not change *(%)*  MCID worsened *(%)*  **b) Physical Sum score**MeanPost *(SD)[95% CI]* ∆Mean between t0 and *t1 (SD)* MedianPost *[IQR]*  MCID improved *(%)*  MCID did not change *(%)*  MCID worsened *(%)* | 48.7 (10.3) [46.7-50.6] +2.9 (10.8) 51.7 [43.6-56.1]  47  27 26  42.7 (10.0) [40.8-44.6] +3.7 (6.8) 44.1 [35.9-50.8]  50  36  14 | 42.3 (11.5) [40.1-44.5] +3.3 (10.2) 44.1 [32.5-52.5]  49  26  25  31.6 (11.1) [29.5-33.8] + 0.3 (7.5) 41.7 [24.0-39.4]  32  37  31 | F(1, 207)=4.182, *p*=.042, ƞp2=.020  F(1, 207)=26.255, *p*<.001, ƞp2=.113 |
| **Eating Behaviour [TFEQ]**  **a)Cognitive Restraint**  MeanPost *(SD)[95% CI]* ∆Mean between t0 and *t1 (SD)* MedianPost *[IQR]*  **b)Disinhibition**  MeanPost *(SD)[95% CI]* ∆Mean between t0 and *t1 (SD)* MedianPost *[IQR]*  **c) Feelings of Hunger**  MeanPost *(SD)[95% CI]* ∆Mean between t0 and t1 *(SD)* MedianPost *[IQR]* | 11.5(3.5) [10.9-12.2] +3.3 (4.2) 12[10-14]  8.1 (3.6) [7.4-8.8] -1.5 (2.8) 8 [6-10]  6.0 (3.6) [5.3-6.7] -1.4 (3.6) 6 [3-8] | 10.7 (4.8) [9.9-11.7] +2.5 (4.9)11 [7-14]  8.5 (3.4) [8.0-9.3] -1.4 (3.4) 8 [7-11]  6.9 (3.4) [6.3-7.6] -1.5 (3.2) 7 [4-10] | F(1)=1.579, *p*=.21  ƞp2=.008  F(1)=0.12, *p*=.912  ƞp2=.000  F(1,207)=1.161, *p*=.283  ƞp2=.000 |
| **Abbreviations:**  ∆Mean between t0 and t1=Mean difference from baseline to post intervention; CI=Confidence Interval; GAD-7=generalized anxiety disorder questionnaire; IQR=Interquartile Range; MCID=minimal clinically important difference; n=sample size; PHQ-9=patient health questionnaire; Post=Post intervention/t1; SD=Standard deviation; SF-12=quality of life questionnaire; POS=participants who had a positive attitude towards bariatric surgery; NEG =participants who had a negative attitude towards bariatric surgery; t0=Baseline; TFEQ=Three-factor eating questionnaire; p<.001 is considered as statistically significant | | | |
